# Supplementary material
Source: ML conference proceedings conference paper supplement (https://proceedings.mlr.press/v89/cardoso19b.html)
Supplement: Supplementary file 1 [file cardoso19b-supp.pdf]

## Appendix A Additional Preliminaries

### A.1 Convexity and Lipschitz Continuity

For a set  $X$  we define its diameter  $D_X = \sup_{x,y \in X} \|x - y\|_2$ . A set  $X \subseteq \mathbb{R}^d$  is a *convex set* if for any  $x, y \in X$  and any  $\lambda \in [0, 1]$ ,  $\lambda x + (1 - \lambda)y \in X$ . For a function  $f : X \rightarrow \mathbb{R}$ , a *subgradient* of  $f$  at a point  $y$ , denoted  $\nabla f(y)$ , is a vector  $g \in \mathbb{R}^d$  such that  $f(x) - f(y) \geq g^\top(x - y)$  for all  $x \in X$ . The *subdifferential* of  $f$  at  $y$ , denoted  $\partial f(y)$ , is the set of all subgradients of  $f$  at  $y$ .

**Definition 5** (Strongly convex function). *Let  $X \subseteq \mathbb{R}^d$  be a convex set. A function  $f : X \rightarrow \mathbb{R}$  is  $H$ -strongly convex for  $H \geq 0$  if,  $f(x) \geq f(y) + \nabla f(y)^\top(x - y) + \frac{H}{2}\|x - y\|_2^2$  for all  $x, y \in X$ . If  $H = 0$ , we say that  $f$  is convex.<sup>2</sup>*

Note that every strongly convex function is also convex. For convex  $f$ , the subdifferential at every point always exists and is a closed convex set.

**Definition 6** (Lipschitz function). *A function  $f : X \rightarrow \mathbb{R}$  is  $L$ -Lipschitz continuous with respect to a norm  $\|\cdot\|$  if  $|f(x) - f(y)| \leq L\|x - y\|$  for every  $x, y \in X$ .*

Lemma 9 gives an equivalence between Lipschitzness of a convex function and properties of that function's subgradients.

**Lemma 9** ([25]). *Let  $f : X \rightarrow \mathbb{R}$  be a convex function. Then  $f$  is  $L$ -Lipschitz over  $X$  with respect to norm  $\|\cdot\|$  if and only if for all  $x \in X$  and for all  $\nabla f(x) \in \partial f(x)$  we have that  $\|\nabla f(x)\|_* \leq L$ , where  $\|\cdot\|_*$  denotes the dual norm of  $\|\cdot\|$ .*

Throughout the paper, we will say that a function  $f$  is  $L$ -Lipschitz to indicate that  $f$  is  $L$ -Lipschitz with respect to the  $L_2$  norm  $\|\cdot\|_2$ , unless otherwise stated. We also note that the  $L_2$  norm is self-dual:  $(\|\cdot\|_2)_* = \|\cdot\|_2$  [24].

### A.2 Tree-Based Aggregation Protocol (TBAP)

The Tree-Based Aggregation Protocol is a tool for maintaining differentially private partial sums of vectors arriving in an online sequence. At each time  $t$ , TBAP outputs a noisy sum of the input vectors up to time  $t$ . This algorithm was first introduced by Chan et al. [7] and Dwork et al. [10], and adapted in its current form by Smith and Thakurta [26].

The algorithm works by maintaining a complete binary tree, where the  $d$ -dimensional input vectors are stored in the leaf nodes, and internal nodes in the tree store a noisy sum of all leaves in their sub-tree. At each time  $t$ , TBAP receives input  $z_t$  and updates the value of the  $t$ -th leaf node to be  $z_t$ . The algorithm also updates the value of each internal node affected by this change to be the updated sum plus noise drawn according to a high-dimensional analog of Laplace noise. The algorithm then outputs a noisy partial sum  $v_t$  of the nodes in the tree that approximately sum to  $z_t$ .

The sum at each internal node is  $(\epsilon/\log_2 T)$ -differentially private, and by construction each  $z_t$  affects only  $\log_2 T$  nodes of the tree. By the *composition property* of differential privacy [9], the entire tree is  $\epsilon$ -differentially private (Theorem 10).

**Theorem 10** ([7, 10]). *TBAP( $\{z_i\}_{i=1}^T, \mu, \epsilon$ ) is  $\epsilon$ -differentially private for any  $\mu > 0$  and any sequence of vectors  $z_1, \dots, z_T$  that each have  $L_2$  norm at most  $\mu$ .*

In addition to being private, TBAP also provides partial sums  $v_t = \sum_{i=1}^t z_i$  that are accurate (with respect to the  $L_2$  norm) up to additive  $O(\frac{d\mu \log^2 T}{\epsilon})$ . This is because the  $L_2$  norm of the noise at each node is Gamma distributed with standard deviation  $O(\frac{\sqrt{d\mu \log T}}{\epsilon})$ , and each partial sum is computed using at most  $\log T$  nodes in the tree.

<sup>2</sup>This is equivalent to the more commonly used definition that  $f$  is convex if for any  $\lambda \in [0, 1]$  and for any  $x, y \in X$ ,  $\lambda f(x) + (1 - \lambda)f(y) \geq f(\lambda x + (1 - \lambda)y)$ .

**Algorithm 4** Tree Based Aggregation Protocol:  $\text{TBAP}(\{z_i\}_{i=1}^T, \mu, \epsilon)$ 

**Input:** Online sequence of vectors  $z_1, \dots, z_T \in \mathbb{R}^d$ ,  $\mu$ :  $L_2$ -norm bound on each  $z_i$ , privacy parameter  $\epsilon$ .  
**Output:** Sequence of noisy partial sums  $v_1, \dots, v_n \in \mathbb{R}$   
 Initialize a binary tree  $A$  of size  $2^{\lceil \log_2 T \rceil + 1} - 1$  with leaves  $z_1, \dots, z_T$   
**for**  $t = 1, \dots, T$  **do**  
     Accept  $z_t$  from the data stream.  
     Let  $P = \{z_t \rightarrow \dots \rightarrow \text{root}\}$  be the path from  $z_t$  to the root.  
     **procedure** TREE UPDATE  
         Let  $\Lambda$  be the first node in  $P$  that is left-child in  $A$ . Let  $P_\Lambda = \{z_t \rightarrow \dots \rightarrow \Lambda\}$ .  
         **for all** nodes  $\alpha$  in path  $P$  **do**  
              $\alpha \leftarrow \alpha + z_t$   
             **if**  $\alpha \in P_\Lambda$  **then**  $\alpha \leftarrow \alpha + \gamma$  where  $\gamma \in \mathbb{R}^d$  is sampled by  $\Pr[\gamma = \hat{\gamma}] \propto e^{-\frac{\|\hat{\gamma}\|_2 \epsilon}{\mu(\lceil \log_2 T \rceil + 1)}}$   
             **end if**  
         **end for**  
     **end procedure**  
     **procedure** OUTPUT PRIVATE PARTIAL SUM  
         Initialize vector  $v_t \in \mathbb{R}^d$  to zero. Let  $b$  be a  $(\lceil \log_2 T \rceil + 1)$ -bit binary representation of  $t$ .  
         **for**  $i = 1, \dots, \lceil \log_2 T \rceil + 1$  **do**  
             **if** bit  $b_i = 1$  **then**  
                 **if**  $i$ -th node in  $P$  (denoted  $P(i)$ ) is the left child in  $A$ , **then**  $v \leftarrow v + P(i)$   
                 **else**  $v_t \leftarrow v_t + \text{left sibling } P(i)$   
                 **end if**  
             **end if**  
         **end for**  
         **return** noisy partial sum  $v_t$   
     **end procedure**  
**end for**

### A.3 The Cost of Privacy in Online Convex Optimization

**Theorem 5.** Let  $\{\hat{x}_t\}_{t=1}^T$  be the non private iterates of RFTL and let  $\{x_t\}_{t=1}^T$  be the private iterates i.e.  $x_{t+1} = \arg \min_{x \in X} v_t^\top x + \frac{H}{2} \|x\|^2$  where  $v_t$  is the private partial sum computed using  $\text{TBAP}\{\nabla f_t(x_t), L, \epsilon\}$ . It holds that

$$\mathbb{E}\left[\sum_{t=1}^T f_t(x_t)\right] \leq \mathbb{E}\left[\sum_{t=1}^T f_t(\hat{x}_t)\right] + \frac{4nL^2T \ln^{1.5}(T)}{\epsilon H}.$$

Where the expectation is taken with respect to the randomness of TBAP.

Our proof follows a similar structure as that of Lemma 8 of [26]. However, we analyze a different algorithm, so the proof details are different.

*Proof.* Let  $J_t = v_t^\top x + \frac{H}{2} \|x\|^2$ . Let  $\xi_t = v_t - \sum_{\tau=1}^t \nabla f_\tau(x_t)$  be the noise added by TBAP to  $\sum_{\tau=1}^t \nabla f_\tau(x_t)$ . Notice that  $x_{t+1} = \arg \min_{x \in \mathcal{K}} J_t(x) + \xi_t^\top x$  and  $\hat{x}_t = \arg \min_{x \in \mathcal{K}} J_t(x)$ . Since  $J_t$  is  $\frac{H}{2}$ -strongly convex we have that

$$\|\hat{x}_{t+1} - x_{t+1}\| \leq \frac{2\|\xi_t\|}{H}.$$

Since each  $\xi_t$  is formed in TBAP by adding at most  $\lceil \ln(T) + 1 \rceil$  vectors with norms drawn from a Gamma distribution with scale  $n$  and shape  $\frac{(\lceil \ln(T) + 1 \rceil)G}{\epsilon}$  we can upper bound  $\mathbb{E}[\|\xi_t\|]$  by  $\frac{4nG \ln^{1.5}(T)}{\epsilon}$ .

Since  $f_t$  is  $L$ -Lipschitz continuous we have that

$$\begin{aligned} \mathbb{E}\left[\sum_{t=1}^T f_t(x_t)\right] &\leq \mathbb{E}\left[\sum_{t=1}^T f_t(\hat{x}_t)\right] + \mathbb{E}\left[L \sum_{t=1}^T \frac{2\|\xi_t\|}{H}\right] \\ &\leq \mathbb{E}\left[\sum_{t=1}^T f_t(\hat{x}_t)\right] + \frac{4nL^2T \ln^{1.5}(T)}{\epsilon H}. \end{aligned}$$

□

## Appendix B Omitted Proofs

### B.1 Full Information Setting

**Theorem 6** (Privacy guarantee).  $\text{SUBMODPRFTL}(\{f_i\}_{i=1}^T, M, H, L, [n], \epsilon)$  is  $\epsilon$ -differentially private for any sequence of functions  $f_1, \dots, f_T$  with bounded range  $[-M, M]$  and for any  $M, H, L, n, T > 0$ .

*Proof.* By Theorem 10 we know that the output of TBAP,  $\{v_t\}_{t=1}^T$ , is  $\epsilon$ -differentially private. By Theorem 3 we get that the sequence  $\{x_t\}_{t=1}^T$  is  $\epsilon$ -differentially private since the procedure  $x_{t+1} \leftarrow \arg \min_{x \in K} v_t^\top x + \frac{H}{2}\|x\|_2^2$  is simply post-processing of the  $v_t$ 's. Computing the output  $\{S_t\}_{t=1}^T$  is further post-processing of the sequence  $\{x_t\}_{t=1}^T$ , and Theorem 3 again yields the result. □

**Theorem 7** (Regret guarantee).  $\text{SUBMODPRFTL}(\{f_i\}_{i=1}^T, M, H, L, [n], \epsilon)$  run with  $H = M\sqrt{T}$  and  $\|\nabla \hat{f}_t\| \leq L = 4M$  for any sequence of submodular functions  $f_1, \dots, f_T : 2^{[n]} \rightarrow [-M, M]$  for any  $M, n, T > 0$  guarantees,

$$\mathbb{E}[\text{Regret}(T)] \leq O\left(\frac{nM^2 \ln^{1.5}(T)\sqrt{T}}{\epsilon}\right),$$

where the expectation is taken over the randomness of TBAP and the sampling procedure used to choose  $S_t$ .

*Proof.* Let  $E_{\text{TBAP}}[\cdot]$  be the expectation taken with respect to the randomness of TBAP. Notice that  $\mathbb{E}[\sum_{t=1}^T f_t(S_t)] = \mathbb{E}_{\text{TBAP}}[\mathbb{E}[\sum_{t=1}^T f_t(S_t)|\text{TBAP}]] = \mathbb{E}_{\text{TBAP}}[\mathbb{E}[\sum_{t=1}^{T-1} f_t(S_t)|\text{TBAP}]] + \mathbb{E}_{\text{TBAP}, \tau_1, \dots, \tau_{T-1}}[\mathbb{E}[f_T(S_T)|\text{TBAP}, \tau_1, \dots, \tau_{T-1}]] = \mathbb{E}_{\text{TBAP}}[\mathbb{E}[\sum_{t=1}^{T-1} f_t(S_t)|\text{TBAP}]] + \mathbb{E}_{\text{TBAP}}[\hat{f}_T(x_T)]$  by definition of  $\hat{f}$ . Repeating the argument  $T - 1$  more times we get  $\mathbb{E}[\sum_{t=1}^T f_t(S_t)] = \mathbb{E}_{\text{TBAP}}[\sum_{t=1}^T \hat{f}_t(\hat{x}_t)]$ . Now,

$$\begin{aligned} &\mathbb{E}\left[\sum_{t=1}^T f_t(S_t) - \min_{S \subseteq [n]} \sum_{t=1}^T f_t(S)\right] \\ &\leq \mathbb{E}\left[\sum_{t=1}^T f_t(S_t) - \min_{x \in \mathcal{K}} \sum_{t=1}^T \hat{f}_t(x)\right] \\ &= \mathbb{E}_{\text{TBAP}}\left[\sum_{t=1}^T \hat{f}_t(x_t) - \min_{x \in \mathcal{K}} \sum_{t=1}^T \hat{f}_t(x)\right] \\ &\leq \mathbb{E}_{\text{TBAP}}\left[\sum_{t=1}^T \hat{f}_t(\hat{x}_t) - \min_{x \in \mathcal{K}} \sum_{t=1}^T \hat{f}_t(x)\right] + \frac{4nL^2T \ln^{1.5}(T)}{\epsilon H} \quad (\text{by Theorem 5}) \\ &\leq \frac{2}{H} \sum_{t=1}^T \|\nabla \hat{f}_t(\hat{x}_t)\|^2 + \frac{H}{2} [\|x\|^2 - \|\hat{x}_1\|^2] + \frac{4nL^2T \ln^{1.5}(T)}{\epsilon H} \quad (\text{by Theorem 4}) \\ &\leq \frac{2TL^2}{H} + \frac{Hn}{2} + \frac{4nL^2T \ln^{1.5}(T)}{\epsilon H} \end{aligned}$$

Plugging in the bound on  $L$  from Lemma 2 and choosing  $H = M\sqrt{T}$  yields the result. □

## B.2 Bandit Setting

**Theorem 8** (Privacy guarantee).  $\text{BANDITSUBMODPRFTL}(\{f_i\}_{i=1}^T, M, H, L, [n], \epsilon, \gamma)$  is  $\epsilon$ -differentially private for any sequence of functions  $f_1, \dots, f_T$  with bounded range  $[-M, M]$  and for any  $M, H, L, n, T, \gamma > 0$ .

*Proof.* By Theorem 10 we know that the output of TBAP,  $\{v_t\}_{t=1}^T$ , is  $\epsilon$ -differentially private. Notice that  $\text{BANDITSUBMODPRFTL}$  is running PRFTL on regularized functions  $\hat{g}_t^\top x + \frac{H}{2}\|x\|^2$  thus by the same reasoning as in Theorem 6, the sequence  $\{x_t\}_{t=1}^T$  is  $\epsilon$ -differentially private since the procedure  $x_{t+1} \leftarrow \arg \min_{x \in K} v_t^\top x + \frac{H}{2}\|x\|^2$  is simply post-processing of the  $v_t$ 's. Since  $\{S_t\}_{t=1}^T$  is post-processing on the sequence  $\{x_t\}_{t=1}^T$ , applying Theorem 3 again completes the proof.  $\square$

**Lemma 3.** Let  $\gamma \in (0, 1)$ . The random vector  $\hat{g}_t$  computed in  $\text{BANDITSUBMODPRFTL}$  is an unbiased estimate of a subgradient of the Lovasz extension  $\hat{f}_t$  of submodular  $f_t$ , evaluated at point  $x_t$ . That is,

$$\mathbb{E}[\hat{g}_t \mid x_t] = \nabla \hat{f}_t(x_t).$$

*Proof.* Notice that conditioned on the randomness up to  $t - 1$

$$\hat{g}_t = \begin{cases} -\frac{1}{\rho_0} f_t(B_0) e(\pi^{-1}(1)) & \text{with probability } \rho_0 \\ \frac{2}{\rho_i} f_t(B_i) e(\pi^{-1}(i)) & \text{with probability } \frac{\rho_i}{2} \text{ for } 1 \leq i \leq n-1 \\ -\frac{2}{\rho_i} f_t(B_i) e(\pi^{-1}(i+1)) & \text{with probability } \frac{\rho_i}{2} \text{ for } 1 \leq i \leq n-1 \\ \frac{1}{\rho_n} f_t(B_n) e(\pi^{-1}(n)) & \text{with probability } \rho_n \end{cases}$$

Therefore

$$\begin{aligned} \mathbb{E}_t[\hat{g}_t] &= \rho_0 \left[ -\frac{1}{\rho_0} f_t(B_0) e(\pi^{-1}(1)) \right] + \frac{\rho_1}{2} \left[ \frac{2}{\rho_1} f_t(B_1) e(\pi^{-1}(1)) - \frac{2}{\rho_1} f_t(B_1) e(\pi^{-1}(2)) \right] \\ &+ \dots + \frac{\rho_{n-1}}{2} \left[ \frac{2}{\rho_{n-1}} f_t(B_{n-1}) e(\pi^{-1}(n-1)) - \frac{2}{\rho_{n-1}} f_t(B_{n-1}) e(\pi^{-1}(n)) \right] + \rho_n \left[ \frac{1}{\rho_n} f_t(B_n) e(\pi^{-1}(n)) \right] \\ &= [f_t(B_1) - f_t(B_0)] e(\pi^{-1}(1)) + [f_t(B_2) - f_t(B_1)] e(\pi^{-1}(2)) + \dots + [f_t(B_n) - f_t(B_{n-1})] e(\pi^{-1}(n)) \end{aligned}$$

This means that  $\mathbb{E}_t[\hat{g}_t](\pi^{-1}(i)) = f_t(B_i) - f_t(B_{i-1})$  for  $i = 1, \dots, n$ . This concludes the proof since  $\mathbb{E}_t[\hat{g}_t](i) = \mathbb{E}_t[\hat{g}_t](\pi^{-1}[\pi(i)]) = f_t(B_{\pi(i)}) - f_t(B_{\pi(i)-1}) = g_t(i)$  for  $i = 1, \dots, n$ .  $\square$

**Lemma 4.** The random vector  $\hat{g}_t$  computed in  $\text{BANDITSUBMODPRFTL}$  satisfies the following bound on its expected  $L_2$ -norm,

$$\mathbb{E}[\|\hat{g}_t\|^2] \leq \frac{16M^2 n^2}{\gamma},$$

where the expectation is taken over the algorithm's internal randomness up to time  $t$ .

*Proof.*

$$\begin{aligned} \mathbb{E}_t[\|\hat{g}_t\|^2] &= \rho_0 \left[ -\frac{1}{\rho_0} f_t(B_0) \right]^2 + \sum_{i=1}^{n-1} \frac{\rho_i}{2} \left[ \left( \frac{2}{\rho_i} f_t(B_i) \right)^2 + \left( -\frac{2}{\rho_i} f_t(B_i) \right)^2 \right] + \rho_n \left[ \frac{1}{\rho_n} f_t(B_n) \right]^2 \\ &\leq 4M^2 \sum_{i=0}^n \frac{1}{\rho_i} \\ &= 4M^2 \sum_{i=0}^n \frac{1}{(1-\gamma)\mu_i + \gamma/(n+1)} \\ &= \sum_{i=0}^n \frac{n+1}{(1-\gamma)\mu_i(n+1) + \gamma} \end{aligned}$$

$$\begin{aligned} &\leq \frac{4M^2(n+1)^2}{\gamma} \\ &\leq \frac{16M^2n^2}{\gamma} \end{aligned}$$

The second to last inequality holds as long as  $\gamma \leq 1$  which will be ensured when we choose the parameters of the algorithm.  $\square$

**Lemma 5** ([14]). *For any submodular function  $f_t : [n] \rightarrow [-M, M]$ , let  $x_t$  and  $S_t$  be the corresponding iterates and sets as defined in BANDITSUBMODPRFTL, then  $\mathbb{E}[f_t(S_t)] \leq \mathbb{E}[\hat{f}_t(x_t)] + 2\gamma M$ . Where the expectation is taken with respect to all the randomness of the algorithm.*

The proof is identical to that of [14]. We present it here for completeness. Let  $\mathbb{E}_t$  be the expectation with respect to the randomness of the algorithm in round  $t$  conditioned on the history up to time  $t-1$ .

*Proof.* We know  $\mathbb{E}_t[f_t(S_t)] = \sum_{i=0}^n \rho_i f_t(B_i)$  and  $\hat{f}_t(x_t) = \sum_{i=0}^n \mu_i f_t(B_i)$ . Therefore,

$$\begin{aligned} \mathbb{E}_t[f_t(S_t)] - \hat{f}_t(x_t) &= \sum_{i=0}^n (\rho_i - \mu_i) f_t(B_i) \\ &\leq \gamma \sum_{i=0}^n \left[ \frac{1}{n+1} + \mu_i \right] |f_t(B_i)| \\ &= \gamma \left( \frac{n}{n+1} + 1 \right) M \\ &\leq 2\gamma M. \end{aligned}$$

Taking expectation with respect to the randomness up to time  $t-1$  yields the result.  $\square$

**Lemma 6.** *Let  $\{\hat{g}_t\}_{t=1}^T$  be the sequence of one point gradient estimates generated by BANDITSUBMODPRFTL( $\{f_i\}_{i=1}^T, M, H, L, [n], \epsilon, \gamma$ ). Then,*

$$\mathbb{E} \left[ \min_{x \in \mathcal{K}} \sum_{t=1}^T \hat{g}_t^\top x \right] \leq \mathbb{E} \left[ \min_{x \in \mathcal{K}} \sum_{t=1}^T \nabla f_t^\top x \right] + \frac{8Mn\sqrt{T}}{\sqrt{\gamma}},$$

where the expectation is taken with respect to all the randomness of the algorithm.

*Proof.* Define  $\alpha_t = \nabla \hat{f}_t - \hat{g}_t$ . Notice that with probability 1

$$\begin{aligned} & \left| \sum_{t=1}^T \hat{g}_t^\top x - \sum_{t=1}^T \nabla \hat{f}_t^\top x \right| \\ & \leq \|x\|_2 \left\| \sum_{t=1}^T \alpha_t \right\|_2 \quad (\text{by Cauchy Schwartz}) \end{aligned}$$

Therefore, with probability 1

$$\min_{x \in \mathcal{K}} \sum_{t=1}^T \hat{g}_t^\top x \leq \min_{x \in \mathcal{K}} \sum_{t=1}^T \nabla \hat{f}_t(x_t)^\top x + \left\| \sum_{t=1}^T \alpha_t \right\|_2. \quad (1)$$

The previous ensures that our regret bound holds against adaptive adversaries.

We next proceed to bound  $\mathbb{E} \left[ \left\| \sum_{t=1}^T \alpha_t \right\|_2 \right]^2$ . By Lemma 10 stated below,  $\mathbb{E}[\alpha_t^\top \alpha_{t'}] = 0$  for  $t \neq t'$ .

$$\begin{aligned}
 \mathbb{E} \left[ \left\| \sum_{t=1}^T \alpha_t \right\|_2 \right]^2 &\leq \mathbb{E} \left[ \left\| \sum_{t=1}^T \alpha_t \right\|_2^2 \right] \quad (\text{by Jensen's inequality}) \\
 &= \sum_{t=1}^T \mathbb{E} [\|\alpha_t\|_2^2] + 2 \sum_{t < t'} \mathbb{E} [\alpha_t^\top \alpha_{t'}] \\
 &= \sum_{t=1}^T \mathbb{E} [\|\nabla \hat{f}_t(x_t) - \hat{g}_t\|_2^2] \\
 &\leq \sum_{t=1}^T \mathbb{E} [2\|\nabla \hat{f}_t(x_t)\|_2^2 + 2\|\hat{g}_t\|_2^2] \\
 &\leq 4T \cdot \frac{16M^2 n^2}{\gamma}
 \end{aligned}$$

where the last line follows from Lemma 4, and the fact that if  $\|\hat{g}_t\|_2 \leq G$  then  $\|\nabla \hat{f}_t(x_t)\|_2 \leq G$  by Jensen's inequality. Taking expectation on both sides of equation 1 yields the result  $\square$

The following lemma was asserted without proof in [26]. We prove it here for completeness.

**Lemma 10.** *Let  $\alpha_t = \nabla \hat{f}_t(x_t) - \hat{g}_t$ . Then, for  $t < t'$  it holds that  $\mathbb{E}[\alpha_t^\top \alpha_{t'}] = 0$ , where the expectation is taken over the randomization of the algorithm used to build the estimates of the gradient  $\{\hat{g}_t\}_{t=1}^T$ .*

*Proof.*

$$\begin{aligned}
 \mathbb{E}[\alpha_t^\top \alpha_{t'}] &= \mathbb{E}[(\nabla \hat{f}_t(x_t) - \hat{g}_t)^\top (\nabla \hat{f}_{t'}(x_{t'}) - \hat{g}_{t'})] \\
 &= \mathbb{E}[\nabla \hat{f}_t(x_t)^\top \nabla \hat{f}_{t'}(x_{t'})] - \mathbb{E}[\nabla \hat{f}_t(x_t)^\top \hat{g}_{t'}] - \mathbb{E}[\nabla \hat{f}_{t'}(x_{t'})^\top \hat{g}_t] + \mathbb{E}[\hat{g}_t^\top \hat{g}_{t'}] \\
 &= \nabla \hat{f}_t(x_t)^\top \nabla \hat{f}_{t'}(x_{t'}) - \nabla \hat{f}_t(x_t)^\top \nabla \hat{f}_{t'}(x_{t'}) - \nabla \hat{f}_{t'}(x_{t'})^\top \nabla \hat{f}_t(x_t) + \mathbb{E}[\hat{g}_t^\top \hat{g}_{t'}]
 \end{aligned}$$

We now show that  $\mathbb{E}[\hat{g}_t^\top \hat{g}_{t'}] = \nabla \hat{f}_{t'}(x_{t'})^\top \nabla \hat{f}_t(x_t)$ .

$$\begin{aligned}
 \mathbb{E}[\hat{g}_t^\top \hat{g}_{t'}] &= \mathbb{E}_{1, \dots, t'-1} [\mathbb{E}_{t'}[\hat{g}_t^\top \hat{g}_{t'} | t = 1, \dots, t' - 1]] \\
 &= \mathbb{E}_{1, \dots, t'-1} [\hat{g}_t^\top \mathbb{E}_{t'}[\hat{g}_{t'} | t = 1, \dots, t' - 1]] \\
 &= \mathbb{E}_{1, \dots, t'-1} [\hat{g}_t^\top \nabla \hat{f}_{t'}(x_{t'})] \\
 &= \nabla \hat{f}_t^\top(x_t) \nabla \hat{f}_{t'}(x_{t'})
 \end{aligned}$$

$\square$

**Lemma 7.** *Let  $\{\hat{g}_t\}_{t=1}^T$  and  $\{x_t\}_{t=1}^T$  be the sequences generated by BANDITSUBMODPRFTL( $\{f_i\}_{i=1}^T, M, H, L, [n], \epsilon, \gamma$ ). Then,*

$$\mathbb{E} \left[ \sum_{t=1}^T \hat{g}_t^\top x_t \right] = \mathbb{E} \left[ \sum_{t=1}^T \nabla \hat{f}_t^\top x_t \right],$$

where the expectation is taken with respect to all the randomness of the algorithm.

*Proof.*

$$\begin{aligned}
 & \mathbb{E}\left[\sum_{t=1}^T \hat{g}_t^\top x_t\right] \\
 &= \mathbb{E}\left[\sum_{t=1}^{T-1} \hat{g}_t^\top x_t\right] + \mathbb{E}[\hat{g}_T^\top x_T] \\
 &= \mathbb{E}\left[\sum_{t=1}^{T-1} \hat{g}_t^\top x_t\right] + \mathbb{E}[\mathbb{E}[\hat{g}_T^\top x_T | \tau = 1, \dots, T-1]] \\
 &= \mathbb{E}\left[\sum_{t=1}^{T-1} \hat{g}_t^\top x_t\right] + \mathbb{E}[x_T^\top \mathbb{E}[\hat{g}_T | \tau = 1, \dots, T-1]] \\
 &= \mathbb{E}\left[\sum_{t=1}^{T-1} \hat{g}_t^\top x_t\right] + \mathbb{E}[x_T^\top \mathbb{E}[\hat{g}_T | \tau = 1, \dots, T-1]] \\
 &= \mathbb{E}\left[\sum_{t=1}^{T-1} \hat{g}_t^\top x_t\right] + \mathbb{E}[x_T^\top \nabla f_T] \quad \text{by Lemma 3.}
 \end{aligned}$$

Repeating the argument  $T - 1$  more times yields the result.  $\square$

**Lemma 8.** Let  $\{x_t\}_{t=1}^T$  be the sequence generated by BANDITSUBMODPRFTL( $\{f_i\}_{i=1}^T, M, H, L, [n], \epsilon, \gamma$ ). Let  $\hat{x}_t$  be the non private iterate of the algorithm, that is  $\hat{x}_{t+1} = \sum_{\tau=1}^t \hat{g}_\tau^\top x + \frac{H}{2} \|x\|^2$ . Then,

$$\mathbb{E}\left[\sum_{t=1}^T \hat{g}_t^\top x_t\right] \leq \mathbb{E}\left[\sum_{t=1}^T \hat{g}_t^\top \hat{x}_t\right] + \frac{64n^3 M^2 T \ln^{1.5}(T)}{\epsilon \gamma H},$$

where the expectation is taken with respect to the randomness of the algorithm.

*Proof.* We follow the proof of Lemma 8 in [26].

Let  $J_t = v_t^\top x + \frac{H}{2} \|x\|^2$ . Let  $\xi_t = v_t - \sum_{\tau=1}^t \hat{g}_\tau$  be the noise added by TBAP to  $\sum_{\tau=1}^t \hat{g}_\tau$ . Notice that  $x_{t+1} = \arg \min_{x \in \mathcal{K}} J_t(x) + \xi_t^\top x$  and  $\hat{x}_t = \arg \min_{x \in \mathcal{K}} J_t(x)$ . Since  $J_t$  is  $H$ -strongly convex we have that

$$\|\hat{x}_{t+1} - x_{t+1}\| \leq \frac{2\|\xi_t\|}{H}.$$

Since each  $\xi_t$  is formed in TBAP by adding at most  $\lceil \ln(T) + 1 \rceil$  vectors with norms drawn from a Gamma distribution with scale  $n$  and shape  $\frac{(\lceil \ln(T) + 1 \rceil) 4Mn}{\sqrt{\gamma} \epsilon}$  we can upper bound  $\mathbb{E}[\|\xi_t\|]$  by  $\frac{16n \ln^{1.5}(T) Mn}{\epsilon \sqrt{\gamma}}$ .

Since  $\hat{g}_t^\top$  is  $\frac{4Mn}{\sqrt{\gamma}}$ -Lipschitz continuous (by Lemma 4, concavity of  $\sqrt{\cdot}$ , and Jensen's inequality) we have that,

$$\begin{aligned}
 \mathbb{E}\left[\sum_{t=1}^T \hat{g}_t^\top x_t\right] &\leq \mathbb{E}\left[\sum_{t=1}^T \hat{g}_t^\top \hat{x}_t\right] + \mathbb{E}\left[\frac{4Mn}{\sqrt{\gamma}} \sum_{t=1}^T \frac{2\|\xi_t\|}{H}\right] \\
 &\leq \mathbb{E}\left[\sum_{t=1}^T \hat{g}_t^\top \hat{x}_t\right] + \frac{64n^3 M^2 T \ln^{1.5}(T)}{\epsilon \gamma H}.
 \end{aligned}$$

$\square$

**Theorem 9** (Regret guarantee). BANDITSUBMODPRFTL( $\{f_i\}_{i=1}^T, M, H, L, [n], \epsilon, \gamma$ ) run with  $H = MT^{2/3}$ ,  $L = \frac{4Mn}{\sqrt{\gamma}}$ , and  $\gamma = \frac{n^{3/2}}{T^{1/3}}$  for any sequence of submodular functions  $f_1, \dots, f_T : 2^{[n]} \rightarrow [-M, M]$  for any  $M, n, T > 0$  guarantees,

$$\mathbb{E}[\text{Regret}(T)] \leq \tilde{O}\left(\frac{MnT^{2/3}}{\epsilon}\right),$$

where the expectation is taken with respect to all the internal randomness of the algorithm.

*Proof of Theorem 9.*

$$\begin{aligned}
 & \mathbb{E} \left[ \sum_{t=1}^T f_t(S_t) - \min_{S \subseteq [n]} \sum_{t=1}^T f_t(S) \right] \\
 & \leq \mathbb{E} \left[ \sum_{t=1}^T f_t(S_t) - \min_{x \in \mathcal{K}} \sum_{t=1}^T \hat{f}_t(x) \right] \\
 & \leq \mathbb{E} \left[ \sum_{t=1}^T \hat{f}_t(x_t) - \sum_{t=1}^T \hat{f}_t(x) \right] + 2\gamma MT \quad (\text{for any } x \in \mathcal{K} \text{ by Lemma 5}) \\
 & \leq \mathbb{E} \left[ \sum_{t=1}^T \nabla \hat{f}_t^\top(x_t - x) \right] + 2\gamma MT \quad (\text{since } \hat{f}_t \text{ is convex}) \\
 & \leq \mathbb{E} \left[ \sum_{t=1}^T \nabla \hat{f}_t^\top x_t \right] - \mathbb{E} \left[ \min_{x \in \mathcal{K}} \sum_{t=1}^T \hat{g}_t^\top x \right] + 2\gamma MT + \frac{8Mn\sqrt{T}}{\sqrt{\gamma}} \quad (\text{by Lemma 6}) \\
 & = \mathbb{E} \left[ \sum_{t=1}^T \hat{g}_t^\top x_t \right] - \mathbb{E} \left[ \min_{x \in \mathcal{K}} \sum_{t=1}^T \hat{g}_t^\top x \right] + 2\gamma MT + \frac{8Mn\sqrt{T}}{\sqrt{\gamma}} \quad (\text{by Lemma 7}) \\
 & = \mathbb{E} \left[ \sum_{t=1}^T \hat{g}_t^\top \hat{x}_t \right] - \mathbb{E} \left[ \min_{x \in \mathcal{K}} \sum_{t=1}^T \hat{g}_t^\top x \right] + 2\gamma MT + \frac{8Mn\sqrt{T}}{\sqrt{\gamma}} + \frac{64n^3 M^2 T \ln^{1.5}(T)}{\epsilon\gamma H} \quad (\text{by Lemma 8}) \\
 & \leq \mathbb{E} \left[ \frac{2}{H} \sum_{t=1}^T \|\hat{g}_t\|_2^2 + \frac{H}{2} [\|x\|_2^2 - \|x_1\|_2^2] \right] + 2\gamma MT + \frac{8Mn\sqrt{T}}{\sqrt{\gamma}} + \frac{64n^3 M^2 T \ln^{1.5}(T)}{\epsilon\gamma H} \quad (\text{for any } x \in \mathcal{K} \text{ by Theorem 4}) \\
 & \leq \frac{32M^2 n^2 T}{H\gamma} + nH + 2\gamma MT + \frac{8Mn\sqrt{T}}{\sqrt{\gamma}} + \frac{64n^3 M^2 T \ln^{1.5}(T)}{\epsilon\gamma H} \quad (\text{by Lemma 4})
 \end{aligned}$$

Choosing  $\gamma = \frac{n^{3/2}}{T^{1/3}}$ ,  $H = MT^{2/3}$  yields the result. □
